# Supplementary material
Source: Springer Nature journal article supplement (https://www.springermedizin.de/resource/supplementary/13685_2014_31_MOESM24_ESM.pdf/9681246)
Supplement: MOESM24 [file 9681246]

Muscle Trx1

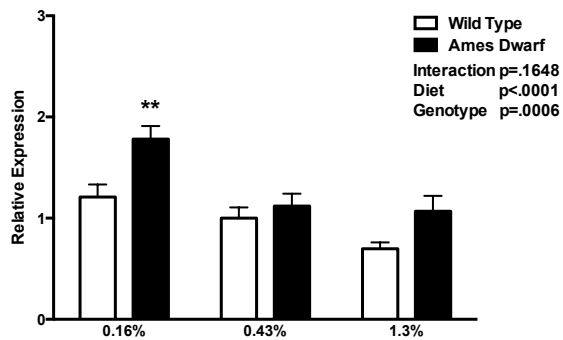

Muscle Trx2

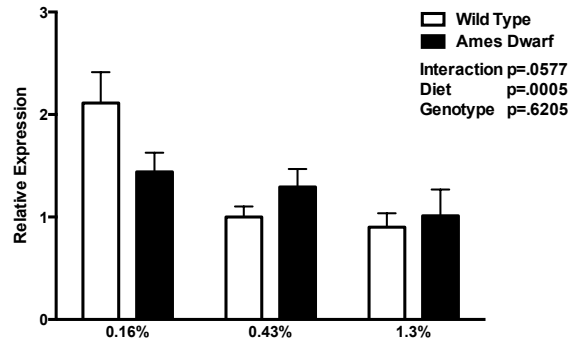

Muscle TrxR1

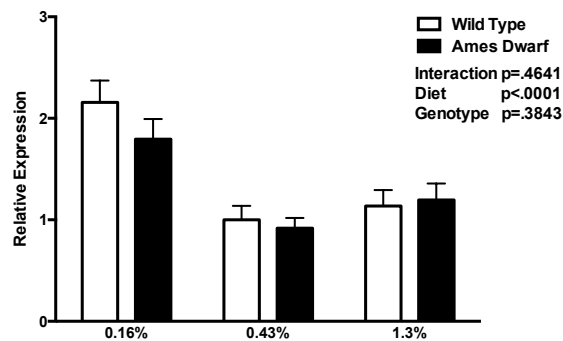

Muscle TrxR2

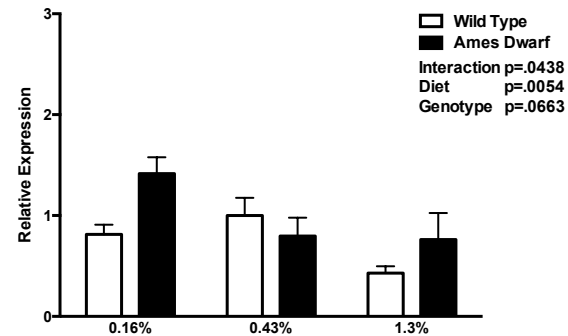

Muscle Grx1

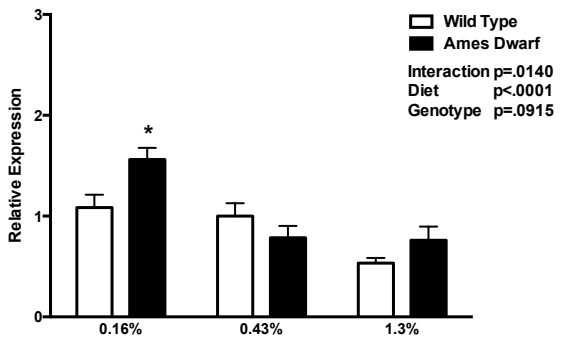

Muscle Grx2

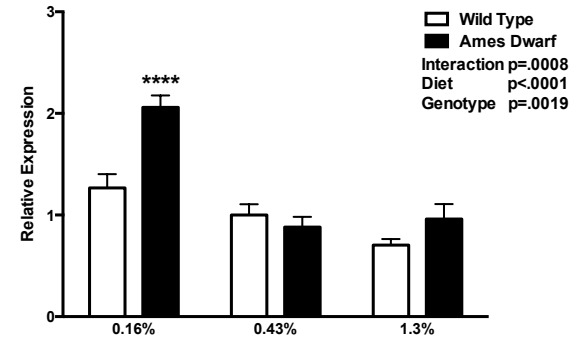

% methionine

% methionine
